# Supplementary material for: Cognitive and Academic Outcomes of Fundamental Motor Skill and Physical Activity Interventions Designed for Children with Special Educational Needs: A Systematic Review
Source: MDPI journal article supplement (doi:10.3390/brainsci12081001), 2022-07-28
Supplement: s1 [file s1]

**Table S1.** Intervention characteristics of the included studies

| Reference                                                                  | Study design | Sample size<br>int/con | Reason for SEN                                                              | Age (range or mean $\pm$ SD),<br>gender (males %)                                            | Cognitive/academic<br>outcome(s) of<br>interest                                                            | Intervention<br>exposure                                           | Inter-<br>vention<br>focus | Intervention                                                                                                                                                                                                                                                                                                                                                                                                                                                 | Activities in<br>control group   |
|----------------------------------------------------------------------------|--------------|------------------------|-----------------------------------------------------------------------------|----------------------------------------------------------------------------------------------|------------------------------------------------------------------------------------------------------------|--------------------------------------------------------------------|----------------------------|--------------------------------------------------------------------------------------------------------------------------------------------------------------------------------------------------------------------------------------------------------------------------------------------------------------------------------------------------------------------------------------------------------------------------------------------------------------|----------------------------------|
| <b>Children at risk for learning difficulties due to family background</b> |              |                        |                                                                             |                                                                                              |                                                                                                            |                                                                    |                            |                                                                                                                                                                                                                                                                                                                                                                                                                                                              |                                  |
| Draper et al., 2012 [21], South Africa                                     | CCT          | 43/40 <sup>a</sup>     | Economically disadvantaged                                                  | Int: age (4.8 $\pm$ 0.5 yrs), gender (44.2%)<br>Con: age (4.8 $\pm$ 0.6 yrs), gender (67.5%) | Cognitive skills: one subdomain of Herbst Early Childhood Development Criteria test                        | 45-60 min, once a week for eight months                            | Combined FMS               | Little champs program included supervised free play and structured, low-intensity activities that aimed to develop speed, agility, eye-hand/eye-foot coordination and spatial awareness. Children had access to sport equipment, like hula hoops, balls, and bean bags. Different kinds of numeracy and literacy tasks were included in the activities, for example counting balls and collecting items of a particular color. Led by Little Champs coaches. | Business as usual control group. |
| Fisher & Turner, 1972a [38], USA                                           | CCT          | 76/26                  | Culturally disadvantaged and low income                                     | Kindergarten children (Age and gender not reported)                                          | Cognitive skills: Slosson Intelligence Test<br>Academic skills: Metropolitan Readiness Tests, Form A       | 2 hr, each school day for one academic year                        | FMS only                   | The intervention included perceptual-motor training exercises which were derived from the Kephart developmental program. The exercises aimed to develop children's balance, posture, locomotion, laterality, and perceptual-motor coordination. Led by a trained physical education teachers.                                                                                                                                                                | Business as usual control group. |
| Fisher & Turner, 1972b [38], USA                                           | CCT          | 26/26                  | Culturally disadvantaged and low income                                     | Kindergarten children (Age and gender not reported)                                          | Cognitive skills: Slosson Intelligence Test<br>Academic skills: Metropolitan Readiness Tests, Form A       | 2 hr, each school day for half an academic year                    | FMS only                   | The intervention included perceptual-motor training exercises which were derived from the Kephart developmental program. The exercises aimed to develop children's balance, posture, locomotion, laterality, and perceptual-motor coordination. Led by a trained physical education teachers.                                                                                                                                                                | Business as usual control group. |
| Flippin et al., 2021 [35], USA                                             | PPD          | 47                     | Low socioeconomic status and/or children with individualised education plan | Age (7.4 $\pm$ 0.3 yrs), gender (48.9%)                                                      | Executive functions, sustained attention: on-task behaviour measured using Noldus Pocket Observer software | Total of three weeks during every school day, in five weeks period | PA only                    | Classrooms were fitted with variety of kinesthetic equipment (i.e., standing desks, exercise balls, kneel-and-spin desks, under desk pedals, bouncy bands). This equipment incorporated movement in the classroom by enabling various motion activities, such as kneeling, balancing, cycling and standing.                                                                                                                                                  | No control group.                |

|                                      |     |         |                           |                                                                                      |                                                                                                                                                      |                                                 |                 |                                                                                                                                                                                                                                                                                                                                                                                                                                                                                                      |                                                                   |
|--------------------------------------|-----|---------|---------------------------|--------------------------------------------------------------------------------------|------------------------------------------------------------------------------------------------------------------------------------------------------|-------------------------------------------------|-----------------|------------------------------------------------------------------------------------------------------------------------------------------------------------------------------------------------------------------------------------------------------------------------------------------------------------------------------------------------------------------------------------------------------------------------------------------------------------------------------------------------------|-------------------------------------------------------------------|
| Kirk et al., 2014 [34], USA          | CCT | 51/21   | Low socioeconomic status  | Int: age (3.8 ± 0.1 yrs), gender (43.1%)<br>Con: age (3.9 ± 0.1 yrs), gender (57.1%) | Language skills: Early Literacy Individual Growth and Development Indicators - Picture Naming, Rhyming and Alliteration                              | 15 min, twice every school day for six months   | Combined PA     | Intervention combined literacy lessons (e.g., picture naming, rhyming and alliteration) with physical activity aiming to get the children to move in moderate activity for 15 min, twice per day. The physical activity, included movements like marching in place and jumping jacks, and was designed to promote learning. Led by teachers and observed by a member of the research team.                                                                                                           | Same content of the literacy lessons, but not integrated with PA. |
| Kirk & Kirk, 2016 [48], USA          | CCT | 39/15   | Low socioeconomic status  | Int: age (4.0 ± 0.2 yrs), gender (35.9%)<br>Con: age (4.1 ± 0.2 yrs), gender (20.0%) | Language skills: Early Literacy Individual Growth and Development Indicators - Picture Naming, Rhyming and Alliteration                              | 30 min, twice every school day for eight months | Combined PA     | Intervention combined literacy lessons (e.g., picture naming, rhyming and alliteration) with physical activity aiming to get the children to move in moderate activity for 30 min, twice per day. The physical activity, included movements like marching in place and jumping jacks, and was designed to promote learning. Led by teachers and observed by a member of the research team.                                                                                                           | Same content of the literacy lessons, but not integrated with PA. |
| Moore et al., 1984 [44], USA         | CCT | 47/38   | Low socioeconomic status  | Kindergarten children (Age and gender not reported)                                  | Academic skills: The Tests of Basic Experience Level K General Concepts Test                                                                         | 30 min, every school day for 12.5 weeks         | FMS only        | The intervention followed Capon's Perceptual-motor Lesson Plans. In each lesson there was three different stations with a different perceptual-motor task, and the children circulated the stations in order. Led by trained aides and teachers.                                                                                                                                                                                                                                                     | Children had 30 min undirected PA at the playground               |
| Mulvey et al., 2018 [30], USA        | RCT | 50/57   | Low income                | Age (5.14 ± 0.81 yrs), gender (45.8%)                                                | Executive functions: Head Toes Knees Shoulders                                                                                                       | 30 min, twice a week for six weeks              | FMS only        | Successful Kinesthetic Instruction for Preschoolers (SKIP) intervention, that aimed to improve fundamental motor skills, including both locomotor and object control skills through cognitively demanding physical activities. The program considered children's individual needs by within-task variation and diverse instruction and feed-back.                                                                                                                                                    | Business as usual control group.                                  |
| Puder et al., 2011 [45], Switzerland | RCT | 342/310 | High immigrant population | Int: age (5.2 ± 0.6 yrs), gender (51.2%)<br>Con: age (5.2 ± 0.6 yrs), gender (48.7%) | Executive functions, attention: Konzentrations-Hand-lungsverfahren für Vorschulkinder<br>Spatial working memory: Intelligence and Development Scales | 45 min, four times a week for one academic year | FMS and PA only | The intervention included physical activity sessions, about nutrition, sleep and media use. In addition, several home activities and extracurricular physical activity were offered for the children. The physical activity lessons were primarily held in the classroom or in the gym, and they aimed to increase coordination and endurance in a playful manner. Equipment, like balls and skipping ropes were also used. Mainly led by teachers, who were supported by a trained health promoter. | Business as usual control group.                                  |

---

**Children with learning difficulties**


---

|                                     |     |       |                                                                     |                                                                                     |                                                                                                                                                                                               |                                         |          |                                                                                                                                                                                                                                                                                                                                                                                                                                                          |                                  |
|-------------------------------------|-----|-------|---------------------------------------------------------------------|-------------------------------------------------------------------------------------|-----------------------------------------------------------------------------------------------------------------------------------------------------------------------------------------------|-----------------------------------------|----------|----------------------------------------------------------------------------------------------------------------------------------------------------------------------------------------------------------------------------------------------------------------------------------------------------------------------------------------------------------------------------------------------------------------------------------------------------------|----------------------------------|
| Berrol, 1984a [39], USA             | CCT | 21/24 | Learning and perceptual-motor problems and low socioeconomic status | Int: age (6.5 yrs), gender (57.1%)<br>Con: age (6.7 yrs), gender (54.2%)            | Executive functions, sustained attention:<br>Children's Checking Test<br>Academic skills: Comprehensive Test of Basic Skills                                                                  | 30 min, three times a week for 13 weeks | FMS only | Dance/Movement Therapy (DMT): The intervention aimed to develop sensory-perceptual-motor function through dance and movement. Fundamental motor skills, balance, posture, object control, visual form perception, and sensory discrimination were trained while reducing hyperactivity. Various materials and equipment were used, e.g., rhythm instruments, bean bags and geometric forms. Led by a researcher and an assistant.                        | Business as usual control group. |
| Berrol, 1984b [39], USA             | CCT | 23/24 | Learning and perceptual-motor problems and low socioeconomic status | Int: age (6.5 yrs), gender (52.2%)<br>Con: age (6.7 yrs), gender (54.2%)            | Executive functions, sustained attention:<br>Children's Checking Test<br>Academic skills: Comprehensive Test of Basic Skills                                                                  | 30 min, three times a week for 13 weeks | FMS only | Sensory Motor Activities (SMA): Intervention included sensory integration activities (tactile, vestibular, proprioceptor). Activities (e.g., posture and balancing training, obstacle courses, form and space perception) were aimed to elicit automatic reactions in contrast to planned responses. Children circulated activity stations individually spending 5 minutes at each station. Led by teachers and supervised by an occupational therapist. | Business as usual control group. |
| Chevalier et al., 2017 [31], Canada | CCT | 7/8   | High risk of ADHD                                                   | Int: age (5.7 ± 0.3 yrs), gender (42.9%)<br>Con: age (5.9 ± 0.3 yrs), gender (100%) | Executive functions, inhibition: Animal Stroop test<br>Selective attention: The Developmental Neuropsychological Assessment Battery<br>Attention: Conners' Kiddie Continuous Performance Test | Three times a week for 12 weeks         | FMS only | The motor-cognitive remediation program (MCRP) included kinesthetics, visual and auditory sensory modalities and its aim was to develop attention control through movement. The program was divided into six groups of main activities and consisted of 30 different sensimotor activities. Led by teachers and parents.                                                                                                                                 | Business as usual control group. |

|                                     |     |                                  |                                                                             |                                                                                                         |                                                                                                                                                                                                        |                                                                                   |                     |                                                                                                                                                                                                                                                                                                                                                                        |                                                                                         |
|-------------------------------------|-----|----------------------------------|-----------------------------------------------------------------------------|---------------------------------------------------------------------------------------------------------|--------------------------------------------------------------------------------------------------------------------------------------------------------------------------------------------------------|-----------------------------------------------------------------------------------|---------------------|------------------------------------------------------------------------------------------------------------------------------------------------------------------------------------------------------------------------------------------------------------------------------------------------------------------------------------------------------------------------|-----------------------------------------------------------------------------------------|
| Coleman & Andersson, 1978 [49], USA | PPD | Group 1: n = 9<br>Group 2: n = 7 | Developmentally delayed and language-impaired children                      | Group 1: 5.1 yrs<br>Group 2: 4.6 yrs                                                                    | Language skills: Assessment of Children's Language Comprehension, and language recognition inventory                                                                                                   | 2.5 hr, four days a week for eight weeks                                          | Combined FMS and PA | The language tasks, covering five language areas (nouns, verbs, adjectives, prepositions, syntax), were structured so that they elicited motor behaviors and whole-body movements (i.e., "show me a dog running", or "make the chair fly"). Led by speech-language pathologists.                                                                                       | No control group.                                                                       |
| Golos et al., 2011 [36], Israel     | CCT | 27/54                            | Children at-risk for developmental delays and with low socioeconomic status | Int: age (4.3 ± 0.3 yrs), gender (100%)<br>Con: age (4.3 ± 0.3 yrs), gender (100%)                      | Cognitive skills: Miller Assessment for Preschoolers complex skills and non-verbal abilities subsets                                                                                                   | One monitoring group: Once a week for 30 min for 10 to 12 sessions during 8 month | Combined FMS        | Children were assigned to one or more monitoring groups, which were: manual dexterity, fundamental motor skills, graphomotor skills, and cognitive skills. Ball and balance skills were practiced in the motor skill group. The monitoring groups were led by trained developmental aide.                                                                              | Business as usual control group. (Students have only few opportunities for play and PA) |
| Golos et al., 2013 [37], Israel     | PPD | 28 <sup>b</sup>                  | Children at-risk for developmental delays and with low socioeconomic status | Preschoolers: age (4.2 ± 0.3 yrs), gender (100%)<br>Kindergarteners: age (5.0 ± 0.3 yrs), gender (100%) | Cognitive skills: Miller Assessment for Preschoolers complex skills and non-verbal abilities subsets                                                                                                   | One monitoring group: Once a week for 30 min for 10 to 12 sessions during 8 month | Combined FMS        | Children were assigned to one or more monitoring groups, which were: manual dexterity, fundamental motor skills, graphomotor skills, and cognitive skills. Ball and balance skills were practiced in the motor skill group. The monitoring groups were led by trained developmental aide.                                                                              | No control group.                                                                       |
| Hendry & Kerr, 1983 [46], Canada    | CCT | 8/8                              | Learning disabled children                                                  | Kindergarten children (Age and gender not reported)                                                     | Language skills: Grouping of items by shape, size, family name and placing picture cards in a logical story sequence. Recognition of alphabets, short words, geometric shapes, and incomplete pictures | 1-1.5 hr, once a week for six months                                              | Combined FMS        | The intervention combined motor and cognitive training, as the children practiced fundamental movements and created own stories through these movements. The story was then written in simple sentences visible for the children, and they were asked to associate the words to the correct movements and answer questions about the story. Led by one of the authors. | Business as usual control group.                                                        |

|                                      |     |       |                                                                                                                                 |                               |                                                                                                                                                      |                                        |          |                                                                                                                                                                                                                                                                                                                                                                                                         |                                                   |
|--------------------------------------|-----|-------|---------------------------------------------------------------------------------------------------------------------------------|-------------------------------|------------------------------------------------------------------------------------------------------------------------------------------------------|----------------------------------------|----------|---------------------------------------------------------------------------------------------------------------------------------------------------------------------------------------------------------------------------------------------------------------------------------------------------------------------------------------------------------------------------------------------------------|---------------------------------------------------|
| Mische Lawson et al., 2012 [43], USA | CCT | 18/15 | Children at high risk due to difficulties with speech, behavior management or other concerns, and with low socioeconomic status | Age (3-5 yrs), gender (60.6%) | Language skills: Grade reports from shape, letter and color recognition, and writing<br>Numeracy: Grade reports from counting and number recognition | 10 min, four days a week for six weeks | FMS only | The intervention sessions included a 10-minute modified form of yoga “Yoga Reflex Integration” -video immediately followed by some motor activity (games, fine motor activities etc.). The video motivated children to do different animal poses, that develop reflex integration and yoga postures. Two teachers, an occupational therapist and paraprofessional were trained to led the intervention. | Control group participated to half-day curriculum |
|--------------------------------------|-----|-------|---------------------------------------------------------------------------------------------------------------------------------|-------------------------------|------------------------------------------------------------------------------------------------------------------------------------------------------|----------------------------------------|----------|---------------------------------------------------------------------------------------------------------------------------------------------------------------------------------------------------------------------------------------------------------------------------------------------------------------------------------------------------------------------------------------------------------|---------------------------------------------------|

---

#### Children with learning disabilities

---

|                                        |     |       |                                                                                                                     |                                                                                      |                                                                                                                              |                                            |                     |                                                                                                                                                                                                                                                                                                                                                                                                                                                                                  |                                                         |
|----------------------------------------|-----|-------|---------------------------------------------------------------------------------------------------------------------|--------------------------------------------------------------------------------------|------------------------------------------------------------------------------------------------------------------------------|--------------------------------------------|---------------------|----------------------------------------------------------------------------------------------------------------------------------------------------------------------------------------------------------------------------------------------------------------------------------------------------------------------------------------------------------------------------------------------------------------------------------------------------------------------------------|---------------------------------------------------------|
| Connor-Kuntz & Dummer, 1996a [40], USA | RCT | 11.11 | Children with cognitive and language delays                                                                         | Int: age (4.8 ± 0.8 yrs), gender (46.2%)<br>Con: age (4.9 ± 0.6 yrs), gender (81.8%) | Academic skills: school readiness composite<br>Language skills: Bracken Basic Concept Scale, the direction/position subscale | 30 min, three times a week for eight weeks | Combined FMS and PA | Physical activities included body management, fundamental motor skills, games, and dance. Activities were combined with language and numeracy training. The motor activities were enriched with learning of concepts like quantity, comparisons, direction, letters, numerals, and colors. Led by researchers.                                                                                                                                                                   | Active control group (i.e., Connor-Kuntz et al., 1996b) |
| Connor-Kuntz & Dummer, 1996b [40], USA | RCT | 11.11 | Children with cognitive and language delays                                                                         | Int: age (4.9 ± 0.6 yrs), gender (81.8%)<br>Con: age (4.8 ± 0.8 yrs), gender (46.2%) | Academic skills: school readiness composite<br>Language skills: Bracken Basic Concept Scale, the direction/position subscale | 30 min, three times a week for eight weeks | FMS and PA only     | Physical activities included body management, fundamental motor skills, games, and dance. Led by researchers.                                                                                                                                                                                                                                                                                                                                                                    | Active control group (i.e., Connor-Kuntz et al., 1996a) |
| Iwanaga et al., 2014 [42], Japan       | CCT | 8/12  | Children with high-functioning autism spectrum disorder (Autistic, asperger's, or pervasive developmental disorder) | Int: age (4.7 ± 0.8 yrs), gender (100%)<br>Con: age (4.7 ± 0.6 yrs), gender (83.3%)  | Language skills : The Japanese version of the Miller Assessment for Preschoolers, verbal and non-verbal subsets              | 60 min, once a week for 9.3 ± 1.0 months   | FMS only            | During sensory integrative therapy (SIT), a therapist and one child acted in a room with equipment like a swing, balance beam, ladder, trampoline, and a ball pit. This equipment and activities presented different sensory and kinetic opportunities and challenged child's postural and bilateral motor control. The specific activities were individually planned for the children. Led by a researcher (certified SI therapist and an occupational therapist) individually. | No control group.                                       |

|                                    |     |       |                                                                                                                                                             |                                                                                          |                                                                                                                                                                                                                                    |                                                                                                                                        |                 |                                                                                                                                                                                                                                                                                                                                                                                                                                                                                                                                                                                                                                                                                                                                                               |                                  |
|------------------------------------|-----|-------|-------------------------------------------------------------------------------------------------------------------------------------------------------------|------------------------------------------------------------------------------------------|------------------------------------------------------------------------------------------------------------------------------------------------------------------------------------------------------------------------------------|----------------------------------------------------------------------------------------------------------------------------------------|-----------------|---------------------------------------------------------------------------------------------------------------------------------------------------------------------------------------------------------------------------------------------------------------------------------------------------------------------------------------------------------------------------------------------------------------------------------------------------------------------------------------------------------------------------------------------------------------------------------------------------------------------------------------------------------------------------------------------------------------------------------------------------------------|----------------------------------|
| Lam et al., 2019 [3], China        | CCT | 60/60 | Children diagnosed with SEN (i.e., children with global developmental delay, autism spectrum disorder, speech developmental delay, or others, such as ADHD) | Int: age (4.08 ± 0.55 yrs), gender (78.3%)<br>Con: age (4.05 ± 0.67 yrs), gender (76.7%) | Cognitive skills: Cognitive subtest of the Developmental Assessment Chart Revised<br>Language skills, verbal comprehension: Reynell Developmental Language Scales Expressive language: Cantonese (Hong Kong) version, respectively | 1-2 hr, each session for one academic year (center-based training).<br>Every school day for one academic year (school-based training). | Combined FMS    | Children received an Individual Education Plan (IEP) which was implemented in school environment. Children also received center-based therapeutic training services: All children received 21-22 sessions of speech therapy, and 33-34 sessions of cognitive and social skills training. Additionally, 30 children received 21-22 sessions of fine motor skills training, and 30 children received 20-21 sessions of gross motor skills training (14 children received both fine motor and gross motor training). The school-based IEP was led by teachers who were trained by a multidisciplinary team of professionals. The center-based sessions were led by speech therapists, a special childcare worker, occupational therapists, and physiotherapists. | Business as usual control group. |
| Wang et al., 2020 [32], China      | CCT | 18/15 | Autism spectrum disorder                                                                                                                                    | Int: age (5.11 ± 0.65 yrs), gender (83.3%)<br>Con: age (4.70 ± 0.70 yrs), gender (86.7%) | Executive functions: Childhood Executive Functioning Inventory                                                                                                                                                                     | 40 min, five days a week for 12 weeks                                                                                                  | FMS and PA only | Each session included a warm-up, basketball skill learning, basketball games and a cool-down, resulting a total of 30 min of moderate-intensity physical activity per session. Led by certified physical educators.                                                                                                                                                                                                                                                                                                                                                                                                                                                                                                                                           | Business as usual control group. |
| Zawadzka et al., 2012 [47], Poland | PPD | 20    | Autistic children                                                                                                                                           | Age (4.8 yrs; range 3 to 6 yrs), gender (85%)                                            | Cognitive skills: Behaviour Observation Scale, adapted for children, cognitive subset                                                                                                                                              | 90 min, once a week for six months                                                                                                     | Combined FMS    | The intervention combined occupational therapy with Veronica Sherborne Developmental Movement Therapy, which is a treatment program for autistic children. Intervention included play, games and exercises that developed cognitive, emotional, social and motor domains of psychomotor development. Led by therapists.                                                                                                                                                                                                                                                                                                                                                                                                                                       | No control group.                |

---

#### Children with physical disabilities

---

|                                |     |                    |                                          |                                                                    |                                                              |                                            |          |                                                                                                                                               |                                  |
|--------------------------------|-----|--------------------|------------------------------------------|--------------------------------------------------------------------|--------------------------------------------------------------|--------------------------------------------|----------|-----------------------------------------------------------------------------------------------------------------------------------------------|----------------------------------|
| Bala et al., 2013 [41], Serbia | PPD | 63/62 <sup>c</sup> | Weight and height below average at birth | Age (6.13 ± 1.04 yrs), gender (63.6%), not reported for each group | Cognitive skills: Raven Progressive Matrices assessment test | 60 min, twice a week for one academic year | FMS only | Kinesiological activities program, including e.g. calisthenics, posture control, exercises for motor abilities, sports games, dance and yoga. | Business as usual control group. |
|--------------------------------|-----|--------------------|------------------------------------------|--------------------------------------------------------------------|--------------------------------------------------------------|--------------------------------------------|----------|-----------------------------------------------------------------------------------------------------------------------------------------------|----------------------------------|

|                                 |     |                 |                                              |                                        |                                                                                         |                                          |              |                                                                                                                                                                                                                                                                                                                                                                                                             |                   |
|---------------------------------|-----|-----------------|----------------------------------------------|----------------------------------------|-----------------------------------------------------------------------------------------|------------------------------------------|--------------|-------------------------------------------------------------------------------------------------------------------------------------------------------------------------------------------------------------------------------------------------------------------------------------------------------------------------------------------------------------------------------------------------------------|-------------------|
| Devesa et al., 2011 [33], Spain | PPD | 11 <sup>d</sup> | Cerebral palsy and growth hormone deficiency | Age (4.12. ± 1.31 yrs), gender (63.6%) | Cognitive skills: the Battelle Developmental Inventory Screening Test, cognitive subset | 45 min, five days a week for four months | Combined FMS | Psychomotor and cognitive stimulation that were adapted to the specific needs of each child. Psychomotor stimulation involved tasks aimed at improving e.g., tonic-postural control, laterality, static and dynamic balance, motor coordination, spatial and temporal orientation, and gross motor skills. Cognitive stimulation aimed to improve e.g., attention, perception, memory and concept learning. | No control group. |
|---------------------------------|-----|-----------------|----------------------------------------------|----------------------------------------|-----------------------------------------------------------------------------------------|------------------------------------------|--------------|-------------------------------------------------------------------------------------------------------------------------------------------------------------------------------------------------------------------------------------------------------------------------------------------------------------------------------------------------------------------------------------------------------------|-------------------|

---

CCT = Controlled clinical trial

PPD = Pre-post design

Studies that have active control group was used as within group design in current analysis.

<sup>a</sup> Article included two different studies. Only study 2 (with cognitive function) is discussed here.

<sup>b</sup> Only children in the longer group included

<sup>c</sup> Only children that were below average are used in this analysis

<sup>d</sup> Only pretreatment period is used in this analysis
